# Supplementary material for: Detection and phasing of single base de novo mutations in biopsies from human in vitro fertilized embryos by advanced whole-genome sequencing
Source: HighWire-hosted journal article supplement (doi:10.1101/gr.181255.114), 2015-02-11
Supplement: Supp_Figures.pdf [file Supp_Figures.pdf]

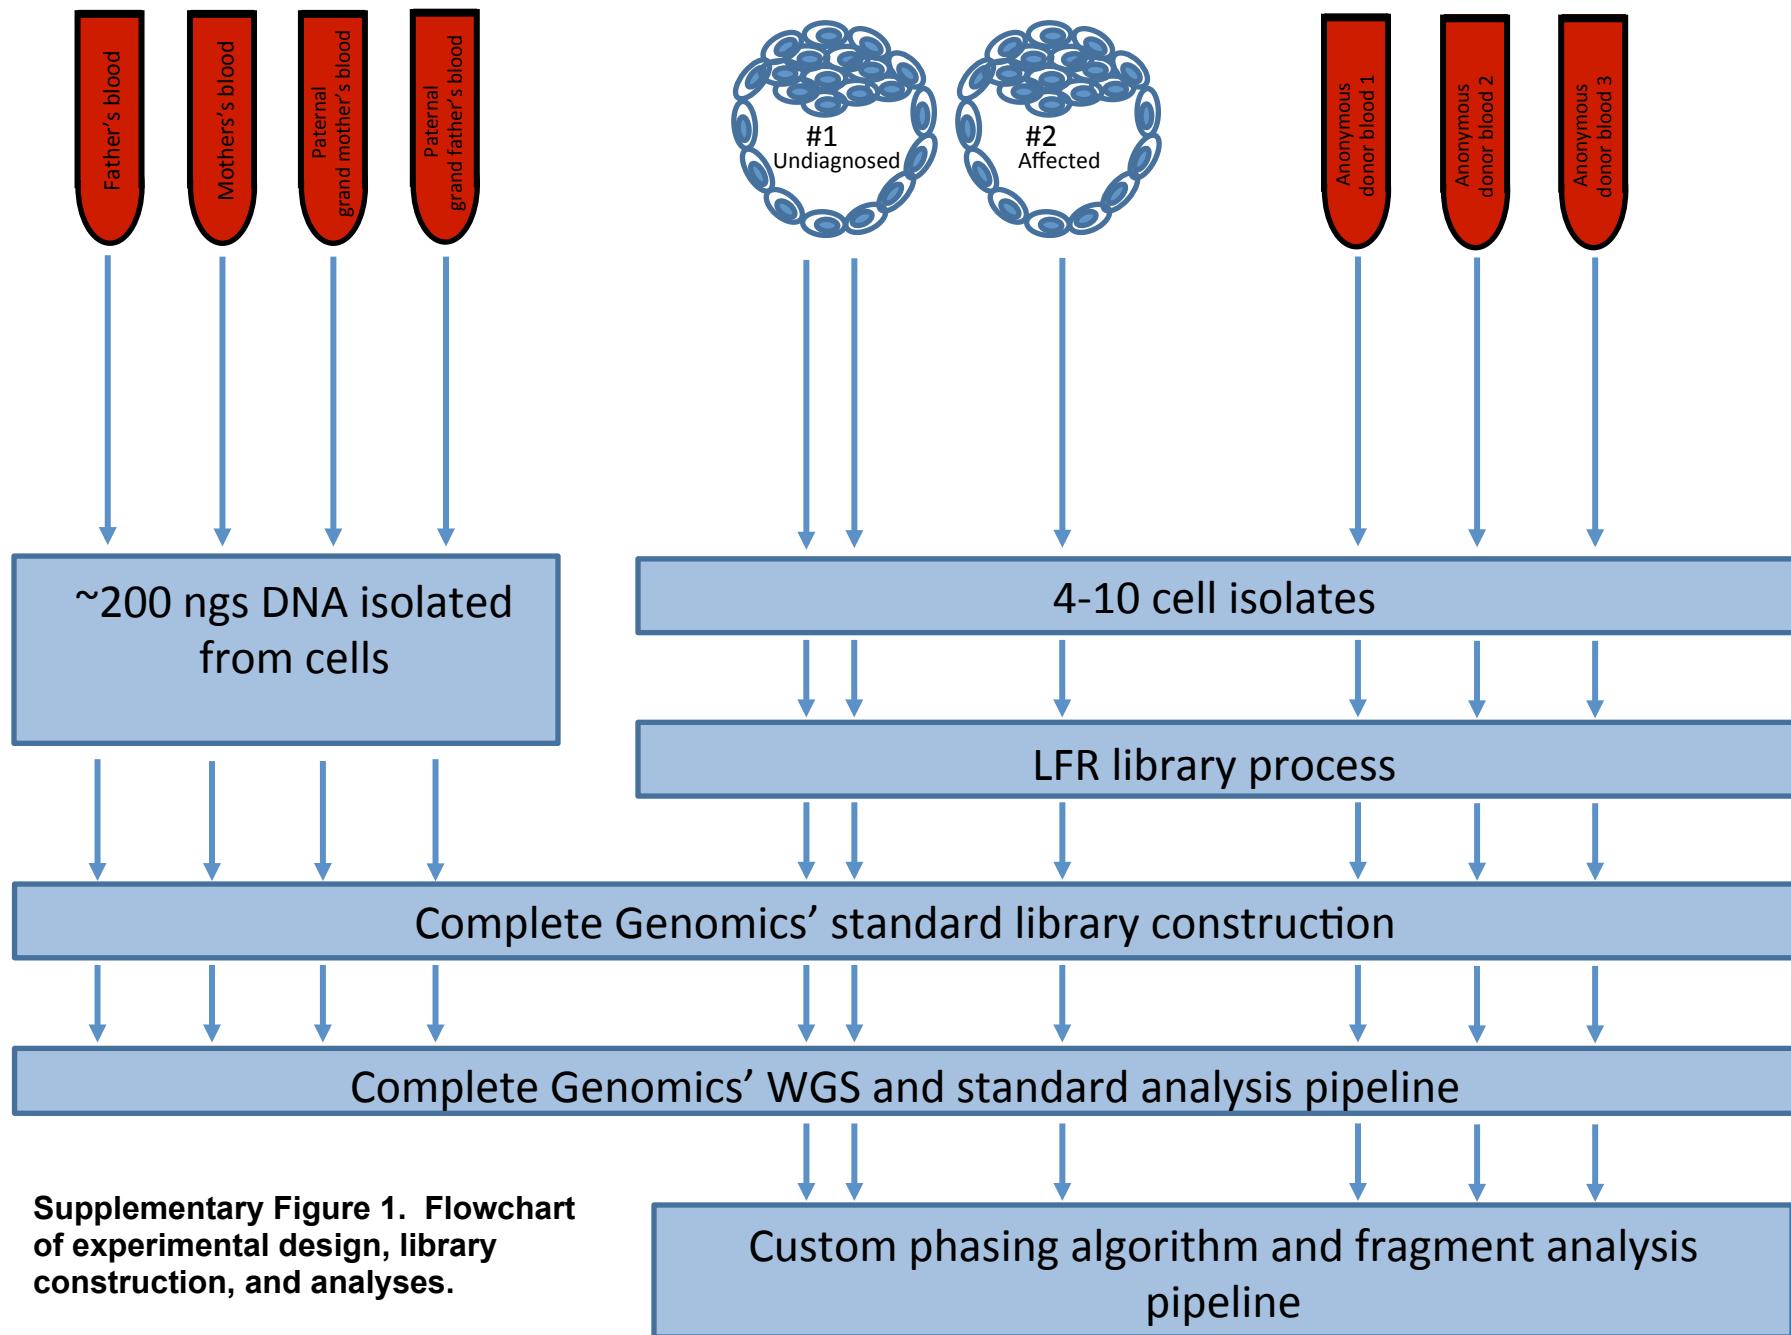

**Supplementary Figure 1. Flowchart of experimental design, library construction, and analyses.**

All heterozygous SNPs  
found in embryo2

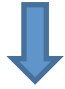

Select only phased heterozygous SNPs  
and heterozygous SNPs found outside  
of LFR contigs

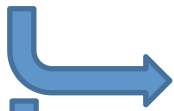

Remove any variant that is not found at a called reference  
position in both parents

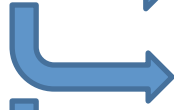

Remove any variant that is detected in the paternal  
grandparents

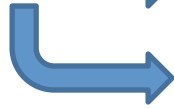

Remove any variant that is found in a database of 400  
healthy octagenarians, 54 unrelated individuals or dbSNP

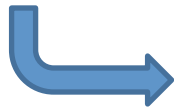

Remove all variants called in embryo #2 for embryo #1  
biopsies and embryo #1 biopsy 1 for embryo #2 as a  
heterozygous or homozygous SNP by CGI's standard  
pipeline, any variant that is phased, or any variant with  
reads found in 1 or more wells. For unphased variants a  
well ratio of less than 3.5 X difference between variant  
and reference wells and less than 4 wells with co-  
existing variant and reference reads was applied.

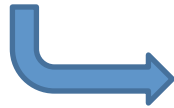

Remove all variants found in 6 or fewer wells

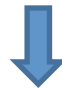

*de novo* SNVs

**Supplementary Figure 2. Analysis flow chart.** This series of steps was taken to remove false positive and inherited SNVs. After these filters are applied the large majority of SNVs are *de novo*. There is still the possibility of some false positives (<10) and possibly a few inherited SNVs that are a result of false negative calls in the parents.

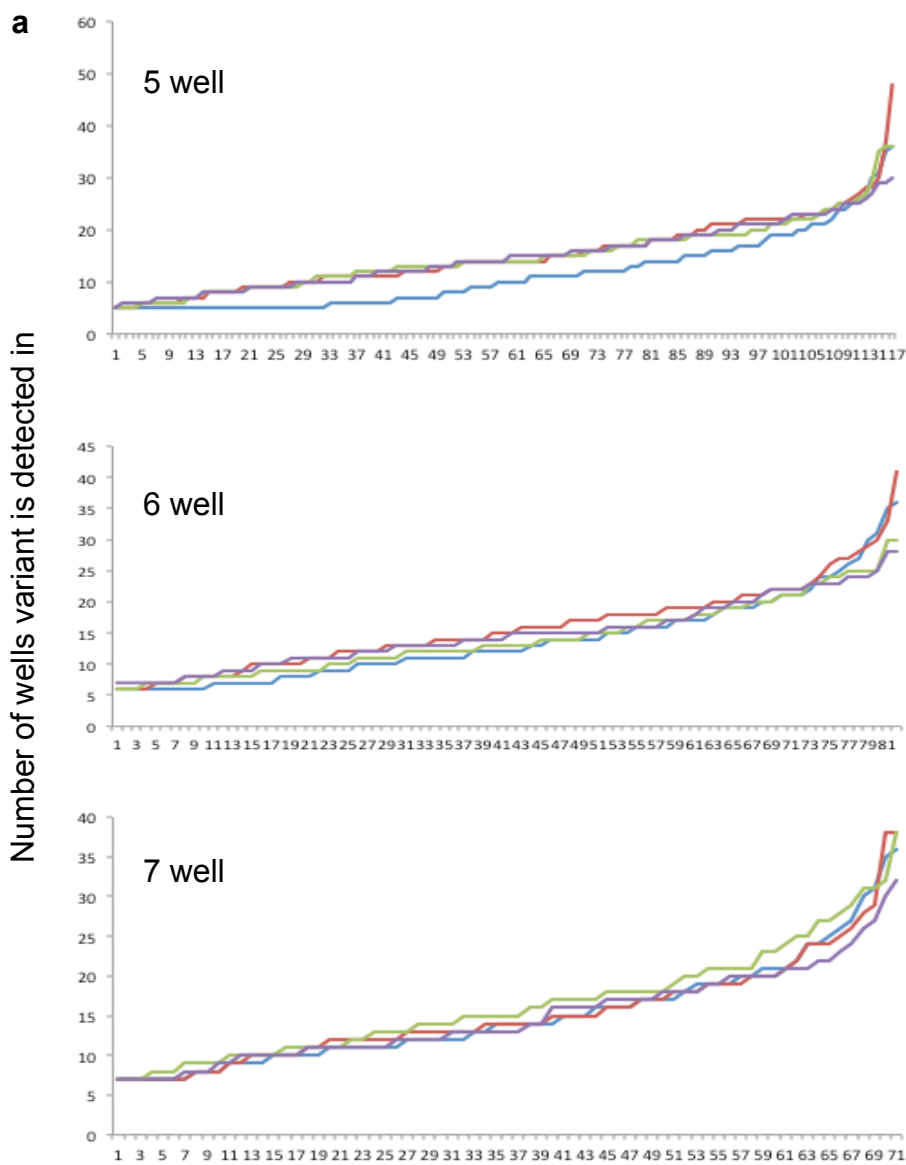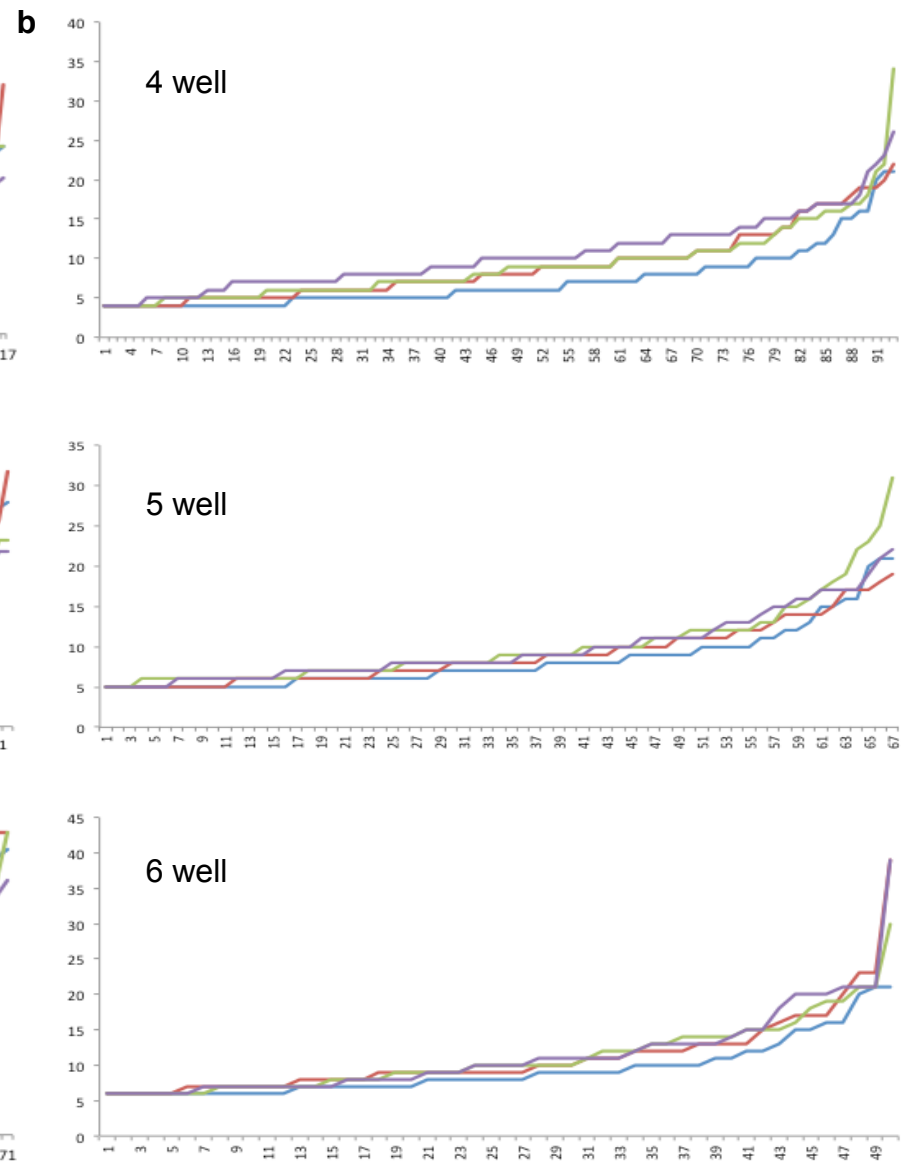

**Supplementary Figure 3. *De novo* detection and false positive removal well threshold analysis.** Different well thresholds were analyzed to determine which wells resulted in *de novo* like SNVs sharing similar properties to 3 random groups of inherited variants. Number of wells a variant was found in was plotted for each variant after first applying the well threshold and then sorting variants based on the number of variant wells for a, embryo #1 biopsy 1, and b, embryo #2. *De novo* variants are plotted in blue, all other colors are randomly selected inherited variants. A well threshold of 6 was used for additional analyses.
