# Supplementary material for: Detection and phasing of single base de novo mutations in biopsies from human in vitro fertilized embryos by advanced whole-genome sequencing
Source: HighWire-hosted journal article supplement (doi:10.1101/gr.181255.114), 2015-02-11
Supplement: Supp_Legends.docx [file Supp_Legends.docx]

Supplementary Materials

Supplementary Methods

Supplementary Figure 1. Flowchart of experimental design, library construction, and analyses.

Supplementary Figure 2. Analysis flow chart.

Supplementary Figure 3. *De novo* detection and false positive removal well threshold analysis.

Supplementary Table 1. Genome statistics.

Supplementary Table 2. Comparison of embryo vs parental phasing.

Supplementary Table 3. Phasing statistics.

Supplementary Table 4. Phasing reduces false positive errors.

Supplementary Table 5. False negative calculation.

Supplementary Table 6. *De novo* mutations found in Embryo #1 biopsies 1 and 2.

Supplementary Table 7. *De novo* mutations found in Embryo #2.

Supplementary Table 8. Cell number versus quality metrics.

Supplementary Table 9. Detection of exon deletions in embryo #1 biopsy 1 by LFR.

Supplementary Table 10. Blood cell control mtDNA calculation.

Supplementary Table 11. mtDNA calculation in embryos.

Supplementary Table 12. Identified mitochondrial variants.

Supplementary Table 13. Total number of genes with potentially detrimental variations.

Supplementary Table 14. Detrimental variants in embryos and controls.
