# Supplementary material for: Detection and phasing of single base de novo mutations in biopsies from human in vitro fertilized embryos by advanced whole-genome sequencing
Source: HighWire-hosted journal article supplement (doi:10.1101/gr.181255.114), 2015-02-11
Supplement: Supp_Materials_and_Methods.docx [file Supp_Materials_and_Methods.docx]

**Supplementary Materials**

**LFR phasing**

We measured the phasing rate of LFR by comparing heterozygous SNV calls and phasing accuracy at the >1.52 million loci in each embryo where inheritance could be assigned to one of the parents. In each embryo >1.4 million SNVs were placed into haplotype contigs resulting in an overall phasing rate of 92.2%-97.6% (Supplementary Table 2). Approximately 650-750 phased SNVs were found to be inherited from a parent (not a false positive error) but were placed in the opposite haplotype in each embryonic genome (Supplementary Table 3); this is similar to what we observed previously and is primarily the result of incorrectly calling one of the parents as homozygous reference when in fact both parents are heterozygous for the variant at that position (Peters et al. 2012). Importantly, even if we assign all of these errors to LFR, this demonstrates that over 99.95% of SNVs from LFR-analyzed embryos are placed in the correct parental haplotype (Supplementary Table 3). Not surprisingly, the highest phasing rate (97.6%) and lowest false negative rate (5.39%) were observed in the embryo #1 biopsy 1 genome made from ~10 cells (Supplementary Table 8). Taken together these results suggest that when 10 cells are available for analysis the vast majority of variants passed to the embryo from the parents are detected and placed into the proper parental haplotype by LFR.

**Mitochondrial DNA sequence analysis**

The average cell carries over 100-fold more copies of mitochondrial DNA than genomic DNA, although the specific number of mitochondria varies dramatically between different cell types (Robin and Wong 1988). We examined the mitochondrial sequence of each embryo and the blood cell control for known pathogenic variants. Not surprisingly, we produced very high coverage for each mitochondrial genome sequence (637-105,607X, Table 1). From the number of wells containing mitochondrial DNA and an estimate of cell number using LFR, we found that blood cells have 3-23 (Supplementary Table 10) copies of the mitochondrial genome per cell. Intriguingly, this number is, in some libraries, as much as 10 fold lower than what has been previously reported (Robin and Wong 1988; Lan et al. 2008; Shen et al. 2008) and it is not clear if some amount of mtDNA was lost during library preparation or if this is a result of sampling. All LFR wells for both biopsies of embryo #1 and for embryo #2 contained full mitochondrial genomes. Based on a binomial distribution of mtDNA assuming pipetting small droplets to make aliquots each having 0.1% chance of having mtDNA, the chance of not having mtDNA in such a droplet is 99.9%. For 250 mtDNA per cell (1250 for library of 5 cells) the chance of not having mtDNA in 6510 droplets is 0.999^6510 = 0.15% of wells or 0.6 wells per plate (Supplementary Table 11). This high number of mtDNA copies is not unexpected for actively dividing cells and allows deep sequence analysis of up to 100,000 fold. Almost all embryos share the same ~36 mitochondrial variants and no secondary mutated mitochondria existed at a frequency greater than 1% (Supplementary Table 12). As expected, a comparison of the mother’s and father’s mitochondrial genomes to each embryonic mitochondrial genome resulted in a near perfect match of these variants to the mother (Supplementary Table 12).

**Assessing inactivated genes**

With accurate phased genome sequences available from the three embryo libraries we set out to determine how many genes were potentially inactivated due to putative detrimental variations in exons and transcription factor binding sites (TFBS). We previously demonstrated (Peters et al. 2012) that LFR phasing can be used to determine which genes have heterozygous detrimental variants on both alleles, leading to gene inactivation. In this study we extended our analyses to include homozygous variants, as we could be confident that we avoided miscalling allelic dropouts as homozygous variants by linking those variants to the surrounding heterozygous SNPs located in phased contigs (Supplementary Table 3 and Supplementary Methods). We found that each embryo harbored more than 200 genes that appear to be inactivated due to coding variants and an additional 200-300 genes that are potentially inactivated when variants to TFBS are taken into account (Supplementary Table 13). Recent studies (MacArthur and Tyler-Smith 2010; MacArthur et al. 2012) have shown that many inactivated genes in humans appear to have redundant functions or are not critical to health. Removing all variants found at a frequency of 10% or more in 54 unrelated genomes and 400 genomes from the Wellderly Project as well as genes found to be “loss of function tolerant” by MacArthur *et al.* (MacArthur and Tyler-Smith 2010; MacArthur et al. 2012) resulted in a dramatic reduction in the number of inactivated genes that might result in a detrimental phenotype, to fewer than 20 in each embryo (Supplementary Table 14). The remaining genes with potentially inactivating variants are poorly annotated and have no functional information that can be used in screening of these embryos. Furthermore, no protein truncating mutations are found after removing all variants present in the 54 unrelated genomes and 400 healthy octogenarians and no *de novo* mutations were found that inactivated any genes. In addition, as mentioned above, no detrimental variants were found in the mitochondrial sequence of each embryo. Repeating this analysis on LFR libraries prepared in a similar fashion from ~5 leukocytes from three anonymous donors show similar numbers of affected genes (Supplementary Table 14), suggesting that these embryos are no different from a normal individual. The 10% frequency threshold may exclude disease-causing variants with high frequency in some populations; however many of these have already been identified and can be analyzed separately.

**Supplementary Methods**

**Methods of Genomic Variant Annotation**

In order to annotate variants identified in these sequencing libraries, variant (VAR) files from both our LFR phasing algorithm and from the standard Complete Genomics output were first merged together to form a larger VAR file. Quality scores for variants were inherited from the standard output VAR file whenever available. This data set was then further annotated with gene descriptions and coding regions using NCBI Genbank *Homo sapiens* genome assembly release version 37.1 as a parameter file.

A selection program was used to identify the genes with variants likely to be detrimental. Detrimental variants fall into two broad categories: (I) those variants that change the amino acid sequence or intron/exon structure; and (II) changes affecting the transcription start site or transcriptional regulation.

Category I variants fall into 2 sub-categories:

1. Variants causing a frameshift, nonstop, splicesite or nonsense mutation in the amino acid sequence.
2. Variants causing an amino acid missense mutation that causes a significant change to a protein using PolyPhen2 (Adzhubei et al. 2010).

Category II variants were identified using ENCODE motif model detection. We used the 683 ENCODE motif models to search through 8,374,968 published DNase I footprints (Neph et al. 2012). Each of these DNase I footprints belongs to one of 2,890,742 larger DNase I hypersensitive sites (DHS), and each DHS represents a promoter region linked to a specific gene; thus, we can link any variant affecting an ENCODE-defined motif to a likely effect on transcription of a certain gene (Thurman et al. 2012). We annotated any variant causing a decrease in motif score of ≥4 as detrimental.

Genes containing 2 or more detrimental variants are grouped into 2 classes:

Class 1. Both Category I variants. All detrimental variants in this class with scores above the threshold are scored as equally detrimental. This class contains two sub-classes:

Class 1.1. The 2 detrimental variants are located on the same allele, based on assembly and phasing data.

Class 1.2. The 2 detrimental variants are located on two different alleles based on assembly and phasing data. Presumably, genes in this subcategory are the most deleterious, as these variants result in a complete lack of wild type protein.

Class 2. Genes with at least 2 detrimental variants, one of which is a Category I variant, and the other is located within an ENCODE DNase I footprint, as predicted by the hidden Markov models (HMM). The impact of the variant is computed based on HMM model scores. Class 2 contains two sub-classes:

Class 2.1. The 2 detrimental variants are located on the same allele, based on assembly and phasing data.

Class 2.2. The 2 detrimental variants are located on two different alleles based on assembly and phasing data.

**Algorithm for identifying exon deletions**

This algorithm identifies exon deletions of 20 bp to 2 Kb using the following criteria:

1. The original fragments were processed by first filling the internal fragment gaps of 2 Kb or less, and then by eroding 0.5 Kb from each end.

2. The processed fragments were labeled as parent1, parent2, both_parents (if there was a conflict) or no_parents (if there was no phasing available). The designation of parent1 or parent2 is applicable only within a contig.

3. The fragments were then sampled at the loci of interest, and each locus received the corresponding fragment label – Mom, Dad, Both, or None.

4. The loci corresponding to each exon were collated and the following signals were computed:

a) Normalized phased wells for the two haplotypes (parent1 and parent2). This signal is the ratio of the phased wells for each haplotype divided by the number of corresponding loci.

b) Normalized region phased wells: Number of phased pulses for each haplotype divided by the number of loci.

c) Double-normalized phased wells: The ratio of the normalized phased wells to the normalized region phased wells.

d) Ratio of normalized phased wells: The maximum of the ratios of the two normalized phased wells.

e) Ratio of normalized region phased wells: The maximum of the ratios of the two normalized region phased wells.

f) Ratio of double-normalized phased wells: The maximum of the ratios of the two double-normalized phased wells.

5. Assessable loci were defined as those loci with a ratio of the double-normalized phased wells greater than or equal to 10.

6. Deletion loci were detected among the assessable loci based on the following criteria (a AND b) AND ((c AND d AND e) OR f)

a) The locus belongs to a phased contig

b) Number of loci is greater than or equal to 1.

c) The maximum of the normalized phased wells is greater than or equal to 6.

d) The minimum of the normalized region phased wells is greater than or equal to 0.

e) The normalized region phased wells is less than or equal to 3.

f) Maximum of normalized phased wells is less than 6 AND minimum of the normalized phased wells is greater than or equal to 2.

**Linking Process**

Linking heterozygous and homozygous loci were performed as follows, for each locus of interest (LOI):

1. A region of interest (ROI) around the locus was identified. The extent of this region was related to the expected size of fragments. For this study, we considered +/-0.5 of the size of the maximum allowed pairing distance (10 Kb) on each side of the locus, which is a fraction of the expected fragment size (20-100 Kb).
2. The longest contig in the ROI (Base Contig) was identified.
3. Wells identifying each of the two phased haplotypes were identified in the Base Contig.
4. Wells for the LOI were identified.
5. The LOI wells were compared to the ROI (phased) wells. If the overlap between the sets was more than the allowed threshold, the LOI was declared as linked to the Base Contig, and appropriate haplotypes were identified. For heterozygous loci, these thresholds were similar to those used in the pairing process of phasing (Peters et al. 2012). For homozygous loci, the thresholds were simplified: the only requirement was for the number of overlapping wells to be greater than or equal to 2.

**References**

Adzhubei IA, Schmidt S, Peshkin L, Ramensky VE, Gerasimova A, Bork P, Kondrashov AS, Sunyaev SR. 2010. A method and server for predicting damaging missense mutations. *Nat Methods* **7**(4): 248-249.

Lan Q, Lim U, Liu CS, Weinstein SJ, Chanock S, Bonner MR, Virtamo J, Albanes D, Rothman N. 2008. A prospective study of mitochondrial DNA copy number and risk of non-Hodgkin lymphoma. *Blood* **112**(10): 4247-4249.

MacArthur DG, Balasubramanian S, Frankish A, Huang N, Morris J, Walter K, Jostins L, Habegger L, Pickrell JK, Montgomery SB et al. 2012. A systematic survey of loss-of-function variants in human protein-coding genes. *Science* **335**(6070): 823-828.

MacArthur DG, Tyler-Smith C. 2010. Loss-of-function variants in the genomes of healthy humans. *Hum Mol Genet* **19**(R2): R125-130.

Neph S, Vierstra J, Stergachis AB, Reynolds AP, Haugen E, Vernot B, Thurman RE, John S, Sandstrom R, Johnson AK et al. 2012. An expansive human regulatory lexicon encoded in transcription factor footprints. *Nature* **489**(7414): 83-90.

Peters BA, Kermani BG, Sparks AB, Alferov O, Hong P, Alexeev A, Jiang Y, Dahl F, Tang YT, Haas J et al. 2012. Accurate whole-genome sequencing and haplotyping from 10 to 20 human cells. *Nature* **487**(7406): 190-195.

Robin ED, Wong R. 1988. Mitochondrial DNA molecules and virtual number of mitochondria per cell in mammalian cells. *J Cell Physiol* **136**(3): 507-513.

Shen M, Zhang L, Bonner MR, Liu CS, Li G, Vermeulen R, Dosemeci M, Yin S, Lan Q. 2008. Association between mitochondrial DNA copy number, blood cell counts, and occupational benzene exposure. *Environ Mol Mutagen* **49**(6): 453-457.

Thurman RE, Rynes E, Humbert R, Vierstra J, Maurano MT, Haugen E, Sheffield NC, Stergachis AB, Wang H, Vernot B et al. 2012. The accessible chromatin landscape of the human genome. *Nature* **489**(7414): 75-82.
