# Supplementary material for: Detection and phasing of single base de novo mutations in biopsies from human in vitro fertilized embryos by advanced whole-genome sequencing
Source: HighWire-hosted journal article supplement (doi:10.1101/gr.181255.114), 2015-02-11
Supplement: Supp_Tables.xlsx [file Supp_Tables.xlsx]

## Sheet: supp table 1
Category	Metric	Call Confidence	Embryo #1 Biopsy 1 LFR	Embryo #1 Biopsy 2 LFR	Embryo #2 LFR	Blood cell control 1 LFR	Blood cell control 2 LFR	Blood cell control 3 LFR	Father STD	Mother STD	Paternal Grandfather STD	Paternal Grandmother STD
Miscellaneous	Gender	NA	FEMALE	FEMALE	FEMALE	FEMALE	MALE	FEMALE	MALE	FEMALE	MALE	FEMALE
Genome coverage	Fully called genome fraction	HIGH	0.958	0.95	0.953	0.881	0.961	0.941	0.956	0.972	0.949	0.971
Genome coverage	Fully called genome fraction	ALL	0.958	0.95	0.953	0.881	0.961	0.942	0.958	0.973	0.951	0.971
Genome coverage	Partially called genome fraction	HIGH	0	0	0	0.001	0	0	0.001	0	0.001	0
Genome coverage	Partially called genome fraction	ALL	0	0	0	0.001	0	0.001	0.001	0	0.001	0
Genome coverage	No-called called genome fraction	HIGH	0.041	0.05	0.047	0.118	0.039	0.058	0.043	0.027	0.05	0.029
Genome coverage	No-called called genome fraction	ALL	0.041	0.049	0.046	0.118	0.039	0.058	0.042	0.027	0.049	0.028
Exome coverage	Fully called exome fraction	HIGH	0.934	0.921	0.911	0.928	0.96	0.92	0.976	0.986	0.974	0.988
Exome coverage	Fully called exome fraction	ALL	0.934	0.921	0.911	0.929	0.96	0.92	0.977	0.986	0.975	0.988
Exome coverage	Partially called exome fraction	HIGH	0	0	0	0	0	0	0	0	0.001	0
Exome coverage	Partially called exome fraction	ALL	0	0	0	0	0	0.001	0	0	0	0
Exome coverage	No-called called exome fraction	HIGH	0.066	0.079	0.089	0.071	0.04	0.08	0.023	0.014	0.025	0.012
Exome coverage	No-called called exome fraction	ALL	0.065	0.079	0.088	0.071	0.039	0.079	0.022	0.013	0.024	0.012
Genome coverage	Gross mapping yield (Gb)	NA	378.817	390.65	390.252	272.131	345.878	332.679	286.506	288.917	294.481	285.591
Genome coverage	Both mates mapped yield (Gb)	NA	280.746	296.204	297.16	171.53	275.304	262.811	226.368	230.486	239.501	228.619
Genome coverage	100k normalized coverage variability	NA	0.143	0.179	0.2	0.191	0.172	0.246	0.023	0.021	0.026	0.032
Genome coverage	Genome fraction where weightSumSequenceCoverage >= 5x	NA	0.992	0.99	0.99	0.985	0.994	0.991	0.995	0.996	0.994	0.995
Genome coverage	Genome fraction where weightSumSequenceCoverage >= 10x	NA	0.983	0.978	0.978	0.952	0.985	0.975	0.989	0.993	0.986	0.991
Genome coverage	Genome fraction where weightSumSequenceCoverage >= 20x	NA	0.954	0.939	0.939	0.841	0.949	0.918	0.962	0.982	0.953	0.971
Genome coverage	Genome fraction where weightSumSequenceCoverage >= 30x	NA	0.907	0.881	0.884	0.707	0.889	0.839	0.908	0.958	0.893	0.93
Genome coverage	Genome fraction where weightSumSequenceCoverage >= 40x	NA	0.843	0.81	0.816	0.579	0.813	0.751	0.827	0.915	0.811	0.86
Exome coverage	Exome fraction where weightSumSequenceCoverage >= 5x	NA	0.975	0.968	0.959	0.989	0.993	0.977	0.998	0.998	0.998	0.998
Exome coverage	Exome fraction where weightSumSequenceCoverage >= 10x	NA	0.95	0.939	0.922	0.969	0.98	0.944	0.995	0.995	0.995	0.997
Exome coverage	Exome fraction where weightSumSequenceCoverage >= 20x	NA	0.9	0.877	0.852	0.899	0.943	0.867	0.98	0.985	0.979	0.989
Exome coverage	Exome fraction where weightSumSequenceCoverage >= 30x	NA	0.845	0.81	0.78	0.8	0.888	0.783	0.946	0.964	0.943	0.968
Exome coverage	Exome fraction where weightSumSequenceCoverage >= 40x	NA	0.785	0.738	0.706	0.692	0.818	0.696	0.887	0.926	0.885	0.927
Library	Mate distribution mean	NA	215	217	221	282	331	326	260	289	218	253
Library	Mate distribution range (.95 confidence interval) min	NA	109	110	108	117	159	151	142	158	118	134
Library	Mate distribution range (.95 confidence interval) max	NA	369	375	386	555	615	611	398	436	342	400
Genome variations	SNP total count	HIGH	3426247	3351395	3343716	3057647	3329638	3132879	3274456	3368198	3240946	3406760
Genome variations	SNP total count	ALL	3579628	3562218	3524479	3348787	3461546	3331316	3526752	3465395	3577356	3529732
Genome variations	Homozygous SNP count	HIGH	1190133	1184066	1202748	1021461	1209804	1392835	1132253	1415933	1114524	1263491
Genome variations	Homozygous SNP count	ALL	1226834	1234781	1247570	1149068	1245855	1466000	1197140	1436415	1189198	1285035
Genome variations	Heterozygous SNP count	HIGH	2073432	1939778	1927103	1611031	1917378	1501106	1884488	1864338	1837325	2051766
Genome variations	Heterozygous SNP count	ALL	2231525	2168920	2128404	1910479	2035176	1688779	2122750	1945322	2157669	2158953
Genome variations	SNP novel fraction	HIGH	0.042	0.046	0.046	0.025	0.021	0.031	0.015	0.017	0.017	0.016
Genome variations	SNP novel fraction	ALL	0.073	0.088	0.08	0.08	0.037	0.057	0.061	0.033	0.082	0.038
Genome variations	Homozygous SNP novel fraction	HIGH	0.004	0.005	0.006	0.002	0.001	0.003	0.001	0.001	0.001	0.001
Genome variations	Homozygous SNP novel fraction	ALL	0.005	0.006	0.006	0.003	0.002	0.004	0.001	0.001	0.001	0.001
Genome variations	Heterozygous SNP novel fraction	HIGH	0.062	0.069	0.068	0.04	0.032	0.055	0.022	0.028	0.026	0.024
Genome variations	Heterozygous SNP novel fraction	ALL	0.109	0.133	0.121	0.123	0.055	0.1	0.095	0.055	0.129	0.058
Genome variations	SNP heterozygous/homozygous ratio	HIGH	1.742	1.638	1.602	1.577	1.585	1.078	1.664	1.317	1.649	1.624
Genome variations	SNP heterozygous/homozygous ratio	ALL	1.819	1.757	1.706	1.663	1.634	1.152	1.773	1.354	1.814	1.68
Genome variations	SNP transitions/transversions ratio	HIGH	2.136	2.119	2.121	2.167	2.137	2.119	2.148	2.13	2.159	2.14
Genome variations	SNP transitions/transversions ratio	ALL	2.091	2.06	2.074	2.083	2.109	2.086	2.098	2.107	2.129	2.118
Genome variations	INS total count	HIGH	202627	205402	218983	142371	209446	202450	193485	240933	189321	239047
Genome variations	INS total count	ALL	260951	271269	289188	197478	292600	294922	331125	354429	336187	361113
Genome variations	INS novel fraction	HIGH	0.209	0.232	0.251	0.127	0.168	0.194	0.12	0.132	0.121	0.138
Genome variations	INS novel fraction	ALL	0.336	0.37	0.386	0.271	0.299	0.343	0.375	0.318	0.398	0.337
Genome variations	INS heterozygous/homozygous ratio	HIGH	1.783	1.807	1.852	1.661	1.868	1.513	1.755	1.516	1.765	1.828
Genome variations	INS heterozygous/homozygous ratio	ALL	2.361	2.497	2.575	2.209	2.625	2.327	3.317	2.501	3.538	3.017
Genome variations	DEL total count	HIGH	205352	203435	213439	142182	198397	184285	206004	252129	206429	249114
Genome variations	DEL total count	ALL	244163	245245	252138	174658	238643	224405	519341	375895	602887	385370
Genome variations	DEL novel fraction	HIGH	0.224	0.229	0.232	0.051	0.06	0.058	0.116	0.093	0.134	0.101
Genome variations	DEL novel fraction	ALL	0.274	0.289	0.283	0.106	0.105	0.109	0.555	0.275	0.624	0.303
Genome variations	DEL heterozygous/homozygous ratio	HIGH	2.122	2.033	1.99	2.12	1.987	1.429	2.168	1.591	2.244	1.992
Genome variations	DEL heterozygous/homozygous ratio	ALL	2.216	2.209	2.148	2.034	2.042	1.513	6.108	2.313	7.72	2.981
Genome variations	SUB total count	HIGH	86710	88808	88991	128674	80309	82288	82073	85986	84391	88057
Genome variations	SUB total count	ALL	101101	106591	104815	192412	152486	192931	459147	206526	576388	251501
Genome variations	SUB novel fraction	HIGH	0.407	0.436	0.431	0.637	0.315	0.37	0.329	0.3	0.358	0.317
Genome variations	SUB novel fraction	ALL	0.48	0.517	0.504	0.745	0.582	0.685	0.858	0.668	0.889	0.728
Genome variations	SUB heterozygous/homozygous ratio	HIGH	3.077	3.208	3.081	7.097	2.518	2.12	2.873	1.968	3.037	2.538
Genome variations	SUB heterozygous/homozygous ratio	ALL	3.447	3.714	3.511	9.573	4.473	4.919	19.494	5.469	25.311	8.318
Exome variations	SNP total count	HIGH	20611	19985	19433	20042	20270	18679	20770	21262	20865	21599
Exome variations	SNP total count	ALL	22983	22889	22246	21621	21547	20751	23066	22105	23658	22445
Exome variations	Homozygous SNP count	HIGH	6738	6591	6622	6997	7394	8026	7595	8887	7442	8160
Exome variations	Homozygous SNP count	ALL	7045	7011	7108	7585	7670	8564	7863	8977	7803	8217
Exome variations	Heterozygous SNP count	HIGH	12483	11500	10822	11023	11564	8704	12033	11936	12060	13071
Exome variations	Heterozygous SNP count	ALL	14850	14487	13741	12630	12703	10538	14288	12699	14850	13853
Exome variations	SNP novel fraction	HIGH	0.049	0.057	0.054	0.019	0.022	0.039	0.014	0.021	0.017	0.016
Exome variations	SNP novel fraction	ALL	0.131	0.154	0.149	0.066	0.053	0.093	0.092	0.049	0.114	0.045
Exome variations	Homozygous SNP novel fraction	HIGH	0.001	0.002	0.005	0.001	0.002	0.006	0.001	0.002	0.001	0.002
Exome variations	Homozygous SNP novel fraction	ALL	0.001	0.003	0.005	0.001	0.002	0.008	0.001	0.002	0.001	0.002
Exome variations	Heterozygous SNP novel fraction	HIGH	0.075	0.09	0.085	0.031	0.034	0.069	0.022	0.035	0.027	0.025
Exome variations	Heterozygous SNP novel fraction	ALL	0.193	0.23	0.225	0.098	0.078	0.152	0.145	0.081	0.178	0.07
Exome variations	SNP heterozygous/homozygous ratio	HIGH	1.853	1.745	1.634	1.575	1.564	1.084	1.584	1.343	1.621	1.602
Exome variations	SNP heterozygous/homozygous ratio	ALL	2.108	2.066	1.933	1.665	1.656	1.23	1.817	1.415	1.903	1.686
Exome variations	SNP transitions/transversions ratio	HIGH	3.058	3.065	3.058	3.017	3.013	3.006	3.071	3.043	3.089	3.04
Exome variations	SNP transitions/transversions ratio	ALL	2.795	2.747	2.726	2.881	2.886	2.811	2.886	2.981	3.018	3.007
Exome variations	INS total count	HIGH	301	318	349	217	293	320	238	258	260	278
Exome variations	INS total count	ALL	592	657	685	372	461	537	868	656	1020	751
Exome variations	INS novel fraction	HIGH	0.434	0.52	0.538	0.191	0.373	0.479	0.229	0.213	0.212	0.25
Exome variations	INS novel fraction	ALL	0.695	0.749	0.758	0.487	0.555	0.662	0.766	0.669	0.78	0.701
Exome variations	INS heterozygous/homozygous ratio	HIGH	2.259	2.863	3.1	0.89	1.232	2.202	1.02	1.121	1.309	1.172
Exome variations	INS heterozygous/homozygous ratio	ALL	5.244	6.8	6.69	2.075	2.347	4.021	6.287	4.426	8.238	4.756
Exome variations	DEL total count	HIGH	187	205	204	173	179	160	344	258	399	295
Exome variations	DEL total count	ALL	390	443	367	248	232	239	2776	751	3690	812
Exome variations	DEL novel fraction	HIGH	0.298	0.354	0.34	0.136	0.11	0.152	0.439	0.287	0.509	0.332
Exome variations	DEL novel fraction	ALL	0.642	0.689	0.621	0.359	0.26	0.376	0.921	0.731	0.941	0.743
Exome variations	DEL heterozygous/homozygous ratio	HIGH	2.286	2.689	2.469	1.9	1.764	1.095	3.662	1.923	4.014	1.978
Exome variations	DEL heterozygous/homozygous ratio	ALL	5.679	6.843	4.93	2.847	2.222	1.838	32.28	7.091	43.28	6.899
Exome variations	SUB total count	HIGH	431	499	395	588	289	331	373	380	400	399
Exome variations	SUB total count	ALL	598	688	591	879	1385	2321	3912	1659	4611	1538
Exome variations	SUB novel fraction	HIGH	0.566	0.625	0.51	0.646	0.245	0.296	0.453	0.397	0.492	0.431
Exome variations	SUB novel fraction	ALL	0.683	0.711	0.663	0.751	0.832	0.889	0.943	0.853	0.954	0.849
Exome variations	SUB heterozygous/homozygous ratio	HIGH	5.981	8.457	5.353	8.582	3.049	2.821	4.868	3.395	5	3.863
Exome variations	SUB heterozygous/homozygous ratio	ALL	8.119	11.1	7.633	12.661	14.831	22.082	61.78	17.469	67.328	18.562
Functional impact	Synonymous SNP loci	HIGH	10006	9626	9331	9770	9716	8948	10110	10363	10167	10510
Functional impact	Synonymous SNP loci	ALL	10703	10488	10155	10304	10132	9674	10813	10632	11064	10779
Functional impact	Non-synonymous SNP loci	HIGH	9335	9121	8877	8982	8975	8308	9138	9339	9115	9471
Functional impact	Non-synonymous SNP loci	ALL	10995	11152	10852	10015	9758	9534	10663	9875	10922	10028
Functional impact	Missense SNP loci	HIGH	9223	9009	8770	8893	8869	8180	9050	9245	9010	9375
Functional impact	Missense SNP loci	ALL	10812	10967	10679	9895	9632	9379	10509	9766	10692	9902
Functional impact	Nonsense SNP loci	HIGH	79	76	77	60	69	103	57	65	68	62
Functional impact	Nonsense SNP loci	ALL	139	144	128	87	84	124	117	78	188	92
Functional impact	Nonstop SNP loci	HIGH	12	14	13	10	15	11	12	10	15	13
Functional impact	Nonstop SNP loci	ALL	18	15	18	11	15	12	15	12	16	13
Functional impact	Misstart SNP loci	HIGH	21	22	17	19	22	14	19	19	22	21
Functional impact	Misstart SNP loci	ALL	26	26	27	22	27	19	22	19	26	21
Functional impact	Disrupt SNP loci	HIGH	72	73	74	77	73	79	67	80	71	74
Functional impact	Disrupt SNP loci	ALL	130	142	138	107	81	103	84	87	117	83
Functional impact	Frame-shifting INS loci	HIGH	152	178	201	69	116	159	78	72	82	83
Functional impact	Frame-shifting INS loci	ALL	412	491	514	196	224	332	600	353	679	396
Functional impact	Frame-shifting DEL loci	HIGH	56	74	76	52	49	49	145	67	179	87
Functional impact	Frame-shifting DEL loci	ALL	235	290	223	108	77	102	2100	438	2788	448
Functional impact	Frame-shifting SUB loci	HIGH	48	38	33	17	16	15	38	21	45	21
Functional impact	Frame-shifting SUB loci	ALL	71	62	62	20	152	232	1137	363	1379	321
Functional impact	Frame-preserving INS loci	HIGH	149	140	148	148	174	150	156	180	169	193
Functional impact	Frame-preserving INS loci	ALL	183	167	174	176	230	190	250	285	323	342
Functional impact	Frame-preserving DEL loci	HIGH	135	133	133	122	127	109	179	178	202	190
Functional impact	Frame-preserving DEL loci	ALL	166	157	150	142	145	132	624	290	809	338
Functional impact	Frame-preserving SUB loci	HIGH	383	461	362	566	241	296	313	332	319	339
Functional impact	Frame-preserving SUB loci	ALL	528	628	530	846	1112	1929	2638	1228	3027	1130
CNV	Total CNV segment count	NA	24291	35813	39793	33812	44297	61458	308	315	350	333
CNV	Total number of bases in CNV segments	NA	666652273	919211861	1026560049	954577689	906776078	1229225603	6105034	7019763	6501975	6724487
CNV	Fraction of novel CNV (by segment count)	NA	0.715	0.721	0.728	0.724	0.716	0.717	0.058	0.06	0.069	0.12
CNV	Fraction of novel CNV (by base count)	NA	0.746	0.746	0.75	0.751	0.735	0.733	0.046	0.068	0.03	0.127
SV	Total junction count	HIGH	0	0	0	0	0	0	1235	1860	961	1476
SV	Total junction count	ALL	0	0	0	0	0	0	3513	4296	2861	4026
Supplementary Table 1. Genome statistics. All assemblies are mapped to NCBI build 37 of the human reference genome. Sequencing, mapping, and assembly were are previously described using Complete Genomics' platform.

## Sheet: supp table 2
	Embryo #1 biopsy 1		Embryo #1 biopsy 2		Embryo #2
	Count	Phasing rate	Count	Phasing rate	Count	Phasing rate
All	1629241		1542109		1522845
Phased	1589776	0.975777	1440025	0.933802	1403229	0.921452
Supplementary Table 2. Comparison of embryo vs parental phasing. To measure the LFR phasing rate called heterozygous variants in the embryo genome were compared to parental sequence data. Variants that are heterozygous in both parents or heterozygous in one parent and homozygous in the other are not assesable by parental data and are not considered in this analysis.

## Sheet: supp table 3
Sample	Phased contigs	# of heterozygous SNPs incorrectly placed in parental contig	Phased heterozygous SNPs	Linked homozygous SNPs
Embryo #1 biopsy 1	7330	757	2058204	672215
Embryo #1 biopsy 2	8063	627	1899297	615943
Embryo #2	8363	661	1836644	604411
Supplementary Table 3. Phasing statistics. This table describes overall phasing statistics for each embryo analyzed by LFR.

## Sheet: supp table 4
	Embryo #1 biopsy 1		Embryo #1 biopsy 2		Embryo #2
	All	Phased	All	Phased	All	Phased
Heterozygous SNVs	2296519	2057173	2228950	1898352	2189221	1835765
Inherited SNVs	2166891	2053261	2045596	1894926	2035924	1832631
SNVs after inherited are removed	129628	3912	183354	3426	153297	3134
SNVs after population variants and redundant sequencing errors are removed	113605	1983	164617	1494	134186	1272
Final false positive rate	0.00398614	6.95789e-05	0.00577604	5.24211e-05	0.00470828	4.46316e-05
Phasing error reduction		57.2895		110.185		105.492
Supplementary Table 4. Phasing reduces false positive errors. After removing inherited SNVs, population variants and redudant sequencing errors, there still remained over 100k SNVs in each embryonic genome. The vast majority of these must be false positive errors as each human genome on average has ~100 de novo mutations and the false negative error rate is only a few percent at most for the pare…

## Sheet: supp table 5
	Embryo #1 biopsy 1		Embryo #1 biopsy 2		Embryo #2
	Count	False negative rate	Count	No call rate	Count	No call rate
Alt homozygous father, reference mother	194419		194419		194419
Phased	184661	0.0501906	170346	0.12382	166188	0.145207
Alt homozygous mother, reference father	268513		268513		268513
Phased	253305	0.0566379	234922	0.1251	230114	0.143006
Total	462932		462932		462932
Phased	437966	0.0539302	405268	0.124563	396302	0.14393
Supplementary Table 5. False negative calculation. Only positions within the parental genomes which could confidently be determined to be reference in one parent and a homozygous variant in the other were used for this calculation. By the laws of inheritance each embryo must be heterozygous at these positions. As expected the embryo with 10 cells available for analysis had the lowest false negati…

## Sheet: supp table 6
Chr.	Begin	End	Reference	Variant	Parental chromosome	Biopsy found de novo	Embryo #1 biopsy 1 detected	Embryo #1 biopsy 1 phased	Embryo #1 biopsy 2 detected	Embryo #1 biopsy 2 phased	Embryo #2 detected	Embryo #2 phased	Embryo #1 biopsy 1 ref wells	Embryo #1 biopsy 1 var wells	Embryo #1 biopsy 1 contig #	Embryo #1 biopsy 2 ref wells	Embryo #1 biopsy 2 var wells	Embryo #1 biopsy 2 contig #	Embryo #2 ref wells	Embryo #2 var wells	Embryo #2 contig #	GeneId	Symbol	Impact	Nucleotide position	Protein position	Sample Sequence	Reference Sequence	Pfam	Polyphen2 Prediction	OMIM Disorders
1	3028039	3028040	G	A	Mother	1 & 2	1	1	1	1	0	0	15	11	15	12	6	20	6	0	0
1	118928201	118928202	T	C	Father	1 & 2	1	1	1	1	0	0	21	27	349	27	17	392	31	0	0
1	145656876	145656877	A	C	Mother	2	1	1	1	1	0	0	5	15	365	11	7	423	15	0	0
1	156417900	156417901	G	A	Father	1 & 2	1	1	1	1	0	0	33	20	406	20	13	469	33	0	0
1	172497740	172497741	T	G	Father	1	1	1	1	0	0	0	22	7	441	6	2	503	8	0	0
1	248839493	248839494	C	T	Father	1 & 2	1	1	1	1	0	0	31	25	636	7	11	714	17	0	0
2	21563	21564	A	G	Father	1 & 2	1	1	1	1	0	0	28	35	1	15	13	1	23	0	0
2	25181650	25181651	A	T	Father	1 & 2	1	1	1	1	0	0	22	16	80	13	20	78	15	0	0
2	25185567	25185568	G	A	Father	1 & 2	1	1	1	1	0	0	18	11	80	12	6	78	7	0	0
2	30082633	30082634	T	C	Father	1	1	1	1	1	0	0	11	16	90	26	4	87	33	0	0
2	31750780	31750781	T	C	Father	1 & 2	1	1	1	1	0	0	38	36	95	30	11	95	33	0	0
2	72494617	72494618	T	C	Undetermined	1	1	0	1	0	0	0	13	8	0	12	1	0	10	0	0
2	90114539	90114540	T	C	Father	1	1	1	1	1	0	0	11	6	240	7	2	252	14	0	0
2	103348257	103348258	C	T	Father	1	1	1	1	1	0	0	14	11	278	5	6	286	17	0	0
2	110017407	110017408	G	A	Father	1	1	1	1	0	0	0	14	9	295	2	4	0	14	0	0
2	163617216	163617217	A	C	Undetermined	1 & 2	1	0	1	0	0	0	25	10	0	13	9	0	10	0	0
2	170460007	170460008	A	T	Father	1	1	1	0	0	0	0	12	6	465	5	0	0	3	0	0
2	192498158	192498159	G	T	Father	1 & 2	1	1	1	1	0	0	21	11	524	6	8	545	19	0	0
2	213912126	213912127	T	C	Mother	1	1	1	1	1	0	0	24	11	589	5	14	610	27	0	0
2	242884659	242884660	C	A	Mother	1	1	1	1	0	0	0	24	12	665	7	3	697	11	0	0
3	9605045	9605046	T	C	Mother	1	1	1	1	1	0	0	15	17	21	5	8	22	18	0	0
3	9614834	9614835	G	C	Mother	1 & 2	1	1	1	1	0	0	19	13	21	10	6	22	12	0	0
3	9615830	9615831	G	C	Mother	1 & 2	1	1	1	1	0	0	16	19	21	7	11	22	13	0	0
3	9620088	9620089	G	C	Mother	1	1	1	1	1	0	0	14	14	21	5	8	22	9	0	0
3	97733072	97733073	C	T	Mother	2	0	0	1	1	0	0	44	0	0	30	6	268	40	0	0
3	137717665	137717666	G	T	Undetermined	1 & 2	1	0	1	0	0	0	8	11	0	8	7	0	14	0	0
3	146185447	146185448	A	G	Mother	1	1	1	0	0	0	0	14	6	378	9	0	0	3	0	0
3	176513831	176513832	T	A	Father	1	1	1	1	1	0	0	18	15	460	5	9	495	11	0	0
3	178759690	178759691	G	A	Undetermined	1	1	0	0	0	0	0	18	6	0	11	0	0	13	0	0
3	182231679	182231680	C	G	Father	1 & 2	1	1	1	1	0	0	30	20	476	22	17	514	38	0	0
3	184073385	184073386	G	A	Father	1 & 2	1	1	1	1	0	0	13	18	483	10	11	522	24	0	0
3	194831791	194831792	T	C	Father	1 & 2	1	1	1	1	0	0	16	21	519	13	8	558	17	0	0
4	18667409	18667410	G	A	Father	1 & 2	1	1	1	1	0	0	11	14	55	11	13	61	21	0	0
4	33556466	33556467	T	C	Undetermined	2	1	0	1	0	0	0	28	1	0	13	6	0	22	0	0
4	80520212	80520213	G	A	Father	1	1	1	1	0	0	0	42	26	225	18	18	0	12	0	0
4	85562270	85562271	C	T	Mother	1	1	1	1	1	0	0	14	7	234	4	4	243	9	0	0
4	165269960	165269961	A	G	Mother	1	1	1	0	0	0	0	28	6	466	17	0	484	18	0	0
4	169952773	169952774	G	C	Mother	1	1	1	1	0	0	0	29	8	484	19	4	0	35	0	0
5	85426863	85426864	G	T	Father	1	1	1	1	0	0	0	11	10	191	5	1	0	13	0	0
5	123976604	123976605	C	G	Father	1 & 2	1	1	1	1	0	0	17	11	304	15	14	331	19	0	0
5	134614411	134614412	C	T	Mother	1 & 2	1	1	1	1	0	0	21	21	334	16	13	359	24	0	0
5	142601478	142601479	G	A	Mother	1	1	1	1	1	0	0	27	7	355	7	4	382	25	0	0
5	150977307	150977308	T	C	Father	1 & 2	1	1	1	1	0	0	19	11	378	6	10	405	19	0	0
5	165312778	165312779	A	G	Mother	1 & 2	1	1	1	1	0	0	19	19	403	15	20	433	33	0	0
5	172471352	172471353	C	G	Father	1	1	1	1	0	0	0	10	12	417	1	1	0	11	0	0
5	179658240	179658241	T	C	Father	1 & 2	1	1	1	1	0	0	13	14	434	6	10	466	14	0	0
6	23601177	23601178	G	A	Mother	1	1	1	1	1	0	0	10	9	66	7	5	71	9	0	0
6	26271342	26271343	C	G	Father	1 & 2	1	1	1	1	0	0	21	19	75	16	6	81	20	0	0
6	45660546	45660547	T	G	Undetermined	1	1	0	1	0	0	0	26	8	0	23	4	0	18	0	0
6	109947496	109947497	C	A	Father	1	1	1	1	1	0	0	21	14	276	4	15	289	19	0	0
6	118735989	118735990	G	A	Father	1	1	1	1	1	0	0	22	24	302	20	4	319	25	0	0
6	170154776	170154777	G	T	Father	1 & 2	1	1	1	1	0	0	17	10	423	17	6	446	21	0	0
7	42248980	42248981	A	G	Father	2	1	1	1	1	0	0	13	5	91	9	10	102	19	0	0
7	54591974	54591975	A	G	Undetermined	1	1	0	0	0	0	0	21	6	0	12	0	0	13	0	0
7	65288153	65288154	A	G	Undetermined	2	1	0	1	0	0	0	10	2	0	13	6	0	11	0	0
7	112329295	112329296	A	G	Father	1 & 2	1	1	1	1	0	0	19	14	284	9	8	308	22	0	0
7	118318372	118318373	C	T	Mother	1	1	1	1	1	0	0	11	10	295	6	4	323	11	0	0
8	42111680	42111681	C	T	Undetermined	2	1	0	1	0	0	0	27	1	0	21	6	0	14	0	0
8	48558981	48558982	T	C	Mother	1	1	1	1	0	0	0	17	6	111	10	1	0	15	0	0
8	54723510	54723511	C	A	Father	1 & 2	1	1	1	1	0	0	28	22	122	15	8	132	21	0	0
8	104070865	104070866	T	G	Father	1	1	1	1	1	0	0	19	9	254	5	8	268	20	0	0
9	75254016	75254017	A	G	Father	1	1	1	1	1	0	0	13	14	104	5	6	124	10	0	0
9	77148940	77148941	T	A	Father	1	1	1	1	0	0	0	18	7	107	6	1	0	10	0	0
9	90306405	90306406	T	C	Father	1	1	1	1	1	0	0	13	10	143	5	9	165	7	0	0
9	111108533	111108534	C	T	Mother	2	0	0	1	1	0	0	59	0	0	28	9	225	31	0	0
10	24479586	24479587	C	T	Father	1 & 2	1	1	1	1	0	0	29	19	48	8	8	55	15	0	0
10	24826087	24826088	A	G	Mother	1	1	1	1	1	0	0	10	15	48	4	7	55	9	0	0
11	17116882	17116883	A	G	Father	2	1	0	1	1	0	0	14	4	0	6	9	39	8	0	0
11	32264732	32264733	G	A	Father	1 & 2	1	1	1	1	0	0	22	10	81	6	11	88	11	0	0
11	85641949	85641950	C	G	Undetermined	1 & 2	1	0	1	0	0	0	14	13	0	9	11	0	8	0	0
12	15995075	15995076	T	C	Mother	1 & 2	1	1	1	1	0	0	16	17	48	12	12	57	13	0	0
12	18340908	18340909	C	G	Undetermined	2	1	0	1	0	0	0	9	3	0	9	7	0	13	0	0
12	43553374	43553375	T	C	Father	2	1	0	1	1	0	0	33	9	0	7	13	105	19	0	0
12	74057426	74057427	A	C	Undetermined	1	1	0	0	0	0	0	17	6	0	12	0	0	15	0	0
12	80687401	80687402	G	A	Mother	1 & 2	1	1	1	0	0	0	21	15	207	8	10	0	19	0	0
12	133672333	133672334	T	A	Mother	1	1	1	1	0	0	0	30	6	366	17	3	399	17	0	0
13	57665526	57665527	T	C	Father	1	1	1	1	0	0	0	9	12	125	10	2	0	22	0	0
13	77313480	77313481	C	G	Undetermined	2	0	0	1	0	0	0	38	0	0	17	9	0	29	0	0
13	77441057	77441058	T	A	Mother	1	1	1	1	0	0	0	16	6	170	2	2	248	8	0	0
14	66701427	66701428	T	C	Father	1 & 2	1	1	1	1	0	0	25	16	127	9	7	129	16	0	0
14	68283319	68283320	C	T	Father	1 & 2	1	1	1	1	0	0	21	16	127	10	11	129	22	0	0
14	105810513	105810514	G	A	Undetermined	1	1	0	1	0	0	0	8	10	0	8	6	0	6	0	0
15	27557307	27557308	G	A	Father	1	1	1	1	1	0	0	11	12	21	8	5	27	15	0	0
15	67947172	67947173	C	T	Father	1	1	1	1	1	0	0	9	9	129	7	5	145	10	0	0
15	85977295	85977296	A	G	Father	2	1	0	1	1	0	0	29	5	0	8	6	196	11	0	0
16	57118786	57118787	G	C	Father	1 & 2	1	1	1	1	0	0	15	17	143	14	11	167	14	0	0
16	61158872	61158873	G	C	Father	1	1	1	1	1	0	0	13	21	152	9	4	175	33	0	0
16	74512391	74512392	A	G	Father	1 & 2	1	1	1	1	0	0	8	17	200	13	13	229	20	0	0
17	4358496	4358497	T	C	Mother	1	1	1	1	0	0	0	17	6	13	9	2	0	6	0	0
17	57749894	57749895	G	A	Father	1 & 2	1	1	1	1	0	0	9	12	174	8	10	194	17	0	0
17	62198386	62198387	T	G	Mother	1	1	1	1	0	0	0	23	8	193	12	1	0	8	0	0
17	66736385	66736386	A	T	Mother	1	1	1	1	0	0	0	23	6	209	9	3	0	23	0	0
17	73269366	73269367	G	A	Father	1 & 2	1	0	1	1	0	0	14	11	0	10	8	250	10	0	0
17	77871853	77871854	A	C	Father	1	1	1	0	0	0	0	19	7	237	10	0	0	11	0	0
19	8482271	8482272	A	G	Father	2	1	0	1	1	0	0	16	6	0	7	6	41	13	0	0
19	19871637	19871638	T	C	Mother	1	1	1	1	0	0	0	12	7	61	11	4	0	9	0	0
19	30397737	30397738	G	A	Father	1	1	1	1	1	0	0	6	8	84	6	4	106	5	0	0
20	7729660	7729661	G	T	Father	1 & 2	1	1	1	1	0	0	26	31	18	12	16	20	29	0	0
20	54987501	54987502	C	A	Mother	1 & 2	1	1	1	1	0	0	29	30	147	16	8	159	24	0	0
21	9468584	9468585	A	G	Undetermined	1	1	1	1	0	0	0	22	12	1	36	5	0	29	0	0
21	29678218	29678219	A	G	Undetermined	1	1	0	1	0	0	0	12	8	0	15	2	0	11	0	0
21	30645939	30645940	T	C	Father	1 & 2	1	1	1	1	0	0	20	8	62	7	6	71	8	0	0
21	33257251	33257252	G	A	Mother	1	1	1	1	1	0	0	7	13	74	4	5	82	17	0	0
21	41095066	41095067	G	A	Father	1 & 2	1	1	1	1	0	0	15	24	90	13	10	100	9	0	0
22	44487632	44487633	C	A	Father	1	1	1	1	1	0	0	11	7	70	6	3	84	1	0	0
X	27645866	27645867	T	C	Undetermined	1 & 2	1	0	1	0	0	0	16	16	0	11	8	0	6	0	0
X	97064036	97064037	T	C	Mother	2	1	1	1	1	0	0	6	3	350	11	6	363	17	0	0
X	97064040	97064041	T	C	Mother	2	1	1	1	1	0	0	5	3	350	8	6	363	16	0	0
X	97064043	97064044	G	A	Mother	2	1	0	1	1	0	0	6	2	0	9	7	363	17	0	0
X	119955714	119955715	T	C	Mother	1	1	1	1	0	0	0	6	6	440	5	4	459	8	0	0
Supplementary Table 6. De novo mutations found in Embryo #1 biopsies 1 and 2. A total of 110 de novo mutations were identified in the 2 biopsies from embryo #1. Of these, 94 were found in biopsy 1 and 58 were found in biopsy 2 and 42 were found in both (columns labeled "Biopsy found de novo"). For each embryo genome, information on if the variant was detected, phased, number wells with reads supp…

## Sheet: supp table 7
Chr.	Begin	End	Reference	Variant	Parental chromosome	Embryo called de novo	Embryo #1 biopsy 1 detected	Embryo #1 biopsy 1 phased	Embryo #1 biopsy 2 detected	Embryo #1 biopsy 2 phased	Embryo #2 detected	Embryo #2 phased	Embryo #1 biopsy 1 ref wells	Embryo #1 biopsy 1 var wells	Embryo #1 biopsy 1 contig #	Embryo #1 biopsy 2 ref wells	Embryo #1 biopsy 2 var wells	Embryo #1 biopsy 2 contig #	Embryo #2 ref wells	Embryo #2 var wells	Embryo #2 contig #	GeneId	Symbol	Impact	Nucleotide position	Protein position	Sample Sequence	Reference Sequence	Pfam	Polyphen2 Prediction	OMIM Disorders
1	20291594	20291595	C	A	Father	Embryo #2	0	0	0	0	1	1	52	0	0	27	0	0	16	21	74
1	54505640	54505641	C	A	Father	Embryo #2	0	0	0	0	1	1	45	0	0	16	0	0	10	20	196
2	74363137	74363138	G	A	Father	Embryo #2	0	0	0	0	1	1	47	0	0	18	0	0	14	7	237
2	106307317	106307318	G	T	Father	Embryo #2	0	0	0	0	1	1	34	0	0	15	0	0	14	8	344
2	171667934	171667935	G	A	Father	Embryo #2	0	0	0	0	1	1	41	0	0	29	0	0	13	9	530
2	208991143	208991144	T	G	Mother	Embryo #2	0	0	0	0	1	1	65	0	0	18	0	0	7	16	640
3	22356656	22356657	T	C	Father	Embryo #2	0	0	0	0	1	1	33	0	0	13	0	0	9	7	37
3	167391149	167391150	G	T	Father	Embryo #2	0	0	0	0	1	1	31	0	0	16	0	0	12	8	470
4	2600729	2600730	G	A	Undetermined	Embryo #2	0	0	0	0	1	0	30	0	0	26	0	0	14	19	0
4	8989231	8989232	T	G	Father	Embryo #2	0	0	0	0	1	1	15	0	0	8	0	0	8	8	45
4	27105944	27105945	G	T	Father	Embryo #2	0	0	0	0	1	1	40	0	0	22	0	0	11	10	100
4	138177896	138177897	G	T	Mother	Embryo #2	0	0	0	0	1	1	34	0	0	22	0	0	10	6	451
4	139359862	139359863	G	C	Undetermined	Embryo #2	0	0	0	0	1	0	58	0	0	30	0	0	21	10	0
5	13411006	13411007	G	A	Mother	Embryo #2	0	0	0	0	1	1	24	0	0	21	0	0	15	15	34
5	50895862	50895863	T	A	Mother	Embryo #2	0	0	0	0	1	1	20	0	0	12	0	0	9	6	109
5	98188211	98188212	T	C	Father	Embryo #2	0	0	0	0	1	1	31	0	0	11	0	0	12	12	237
6	91829182	91829183	C	A	Father	Embryo #2	0	0	0	0	1	1	38	0	0	19	0	0	8	9	255
6	153412066	153412067	A	G	Father	Embryo #2	0	0	0	0	1	1	32	0	0	25	0	0	10	8	421
7	69839189	69839190	G	A	Father	Embryo #2	0	0	0	0	1	1	35	0	0	26	0	0	10	6	206
7	101758343	101758344	C	G	Mother	Embryo #2	0	0	0	0	1	1	44	0	0	24	0	0	13	16	315
8	40784416	40784417	A	C	Father	Embryo #2	0	0	0	0	1	1	37	0	0	23	0	0	6	10	109
8	76856361	76856362	G	C	Mother	Embryo #2	0	0	0	0	1	1	31	0	0	20	0	0	9	7	202
8	108176893	108176894	G	A	Father	Embryo #2	0	0	0	0	1	1	8	0	0	6	0	0	8	8	302
9	3993147	3993148	G	C	Mother	Embryo #2	0	0	0	0	1	1	28	0	0	32	0	0	9	7	12
9	4578264	4578265	T	G	Mother	Embryo #2	0	0	0	0	1	1	47	0	0	23	0	0	17	6	15
9	38115590	38115591	C	G	Father	Embryo #2	0	0	0	0	1	1	60	0	0	32	0	0	13	21	113
9	97735251	97735252	C	A	Undetermined	Embryo #2	0	0	0	0	1	0	57	0	0	36	0	0	24	7	0
10	87892782	87892783	C	G	Undetermined	Embryo #2	0	0	0	0	1	0	42	0	0	12	0	0	22	7	0
11	108970899	108970900	T	C	Father	Embryo #2	0	0	0	0	1	1	32	0	0	12	0	0	11	6	354
11	109375021	109375022	G	T	Father	Embryo #2	0	0	0	0	1	1	25	0	0	24	0	0	7	6	355
11	109457861	109457862	A	G	Father	Embryo #2	0	0	0	0	1	1	24	0	0	15	0	0	12	6	355
12	23322177	23322178	G	T	Undetermined	Embryo #2	0	0	0	0	1	0	25	0	0	27	0	0	6	9	0
12	58017654	58017655	G	T	Mother	Embryo #2	0	0	0	0	1	1	74	0	0	34	0	0	15	9	190	65012	SLC26A10	MISSENSE	1400	363	L	V	PFAM:PF00860:Xan_ur_permease	possibly damaging
12	133579711	133579712	G	A	Father	Embryo #2	0	0	0	0	1	1	58	0	0	13	0	0	6	7	437
14	22298608	22298609	C	T	Mother	Embryo #2	0	0	0	0	1	1	36	0	0	17	0	0	9	7	6
14	36872284	36872285	C	A	Mother	Embryo #2	0	0	0	0	1	1	41	0	0	23	0	0	9	8	49
14	95722533	95722534	G	T	Father	Embryo #2	0	0	0	0	1	1	42	0	0	16	0	0	13	9	225
15	24268817	24268818	C	G	Undetermined	Embryo #2	0	0	0	0	1	0	27	0	0	24	0	0	9	6	0
15	52028432	52028433	C	T	Mother	Embryo #2	0	0	0	0	1	1	41	0	0	23	0	0	10	12	128
16	7736788	7736789	C	A	Mother	Embryo #2	0	0	0	0	1	1	28	0	0	17	0	0	8	8	34
16	84934232	84934233	G	T	Mother	Embryo #2	0	0	0	0	1	1	41	0	0	14	0	0	7	6	294
17	62233971	62233972	G	A	Undetermined	Embryo #2	0	0	0	0	1	0	39	0	0	18	0	0	20	7	0
18	24790290	24790291	C	T	Father	Embryo #2	0	0	0	0	1	1	37	0	0	19	0	0	17	7	68
18	34507674	34507675	C	T	Father	Embryo #2	0	0	0	0	1	1	47	0	0	32	0	0	14	6	108
18	45711116	45711117	G	T	Mother	Embryo #2	0	0	0	0	1	1	32	0	0	21	0	0	10	9	142
19	9525356	9525357	G	T	Undetermined	Embryo #2	0	0	0	0	1	0	46	0	0	21	0	0	17	7	0	10781	ZNF266	MISSENSE	1514	81	K	Q		possibly damaging
20	9083010	9083011	A	C	Father	Embryo #2	0	0	0	0	1	1	23	0	0	17	0	0	6	10	24
20	9327324	9327325	G	A	Father	Embryo #2	0	0	0	0	1	1	48	0	0	38	0	0	12	7	26
20	54554996	54554997	C	A	Mother	Embryo #2	0	0	0	0	1	1	30	0	0	22	0	0	14	9	160
X	105657333	105657334	C	T	Undetermined	Embryo #2	0	0	0	0	1	0	38	0	0	11	0	0	9	13	0
Supplementary Table 7. De novo mutations found in Embryo #2. A total of 50 de novo mutations were identified in embryo #12. For each embryo genome, information on if the variant was detected, phased, number wells with reads supporting the variant and the reference calls, and the contig number are provided. Each contig in which a variant was found was compared to the maternal and paternal genomes …

## Sheet: supp table 8
Sample	Cell #	Phased SNPs	Phasing Rate	% Contig Coverage	N50	False Negative Rate	de novo SNVs #	de novo SNV Sensitivity	Exon Deletions
Embryo 1 biopsy 1	10	2057173	0.975777	0.78	640	0.0539	94	0.822	6
Embryo 1 biopsy 2	4	1898352	0.933802	0.75	561	0.1246	48	0.533	N/A
Embryo 2	5	1835765	0.921452	0.74	525	0.1439	41	0.502	N/A
Blood cell 1	5	1389666	N/A	0.63	359	N/A	N/A	N/A	N/A
Blood cell 2	5	1715454	N/A	0.63	333	N/A	N/A	N/A	N/A
Blood cell 3	3	788535	N/A	0.42	126	N/A	N/A	N/A	N/A
Supplementary Table 8. Cell number versus quality metrics. Various measures of quality from other tables and figures are aggregated in this table. 10 cells are clearly necessary for the highest quality and coverage of a genome using our process.

## Sheet: supp table 9
Chromosome	Begin	End	Length	Genome	Father mate-pair evidence begin-end	Father mate-pair overlap length	Father mate-pair overlap percentage	Father read coverage	Mother read coverage	DGV database begin-end	DGV overlap length	DGV overlap percentage	Gene	GeneID	Missing region model	cd Start	cd End	CCDS	Frame shift	Pfam Hit
19	6952512	6953330	818	E1B1				0.694206	0.869601	6951566-7083629	818	100	EMR4P	326342	e1-i1	6953203	6974606	NA	NA	NA
12	9620234	9620302	68	E1B1				0.642246	0.679015	9617082-9755578	68	100	OVOS	408186	NA	9620233	9725776	NA	NA	NA
17	79426280	79426355	75	E1B1				0.80431	1.13753	79380546-79493705	75	100	BAHCC1	57597	e21-i21	79373539	79430843	NA	NA	NA
10	27224355	27224557	202	E1B1;E1B2				0.427191	0.858856	27224051-27228080	202	100	LINC00202	387644	e3-i3	27220134	27220134	NA	NA	NA
5	34850291	34850414	123	E1B1;E1B2	34850261-34850975	123	100	0.367071	1.1001	34778370-34898304	123	100	TTC23L	153657	e4-i4	34840776	34896883	CCDS54840.1	Yes	No
5	147553798	147553934	136	E1B1;E1B2;E2				0.391983	0.861401	147553714-147554939	136	100	SPINK14	408187	e3-i3	147549295	147554961	CCDS4288.1	Yes	Yes
Supplementary Table 9. Detection of exon deletions in embryo #1 biopsy 1 by LFR. Consecutive 50 bp windows were used to measure parental coverage. Low coverage (suggesting a potential deletion) in parental genomes is noted in red.

## Sheet: supp table 10
	# of wells with mtDNA	Estimated cell #	mtDNA per cell
Blood cell control 1	65	5	6.5
Blood cell control 2	34	5	3.4
Blood cell control 3	139	3	23.1667
Supplementary Table 10. Blood cell control mtDNA calculation. Denaturing mtDNA results in a two fold increase in the number of copies that call be dispersed across the 384 well LFR library plate, otherwise dividing the number of wells by the number of cells gives a reasonable estimate of the number of mtDNA per cell.

[truncated: 4 more sheets: supp table 11, supp table 12, supp table 13, supp table14]
